# Supplementary material for: Multilayer Electrospun Scaffolds of Opposite-Charged Chitosans
Source: MDPI journal article supplement (doi:10.3390/ijms25063256), 2024-03-13
Supplement: s1 [file s1]

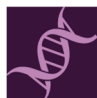

Supplementary Materials

# Multilayer Electrospun Scaffolds of Opposite-Charged Chitosans

Cristian Balducci <sup>1</sup>, Martina Roso <sup>1</sup>, Annj Zamuner <sup>1,2</sup>, Lucia Falcigno <sup>3</sup>, Gabriella D'Auria <sup>3</sup>, Paola Brun <sup>4</sup> and Monica Dettin <sup>1,\*</sup>

<sup>1</sup> Department of Industrial Engineering, University of Padova, Via Marzolo 9, 35131 Padova, Italy; cristian.balducci@phd.unipd.it (C.B.); martina.roso@unipd.it (M.R.); annj.zamuner@unipd.it (A.Z.)

<sup>2</sup> Department of Civil, Architectural and Environmental Engineering, University of Padova, Via Marzolo 9, 35131 Padova, Italy

<sup>3</sup> Department of Pharmacy, University Federico II of Naples, Via Domenico Montesano 49, 80131 Naples, Italy; falcigno@unina.it (L.F.); gabriella.dauria@unina.it (G.D.)

<sup>4</sup> Department of Molecular Medicine, University of Padova, Via A. Gabelli 63, 35121 Padua, Italy; paola.brun.1@unipd.it

\* Correspondence: monica.dettin@unipd.it; Tel.: +39-049-8275553

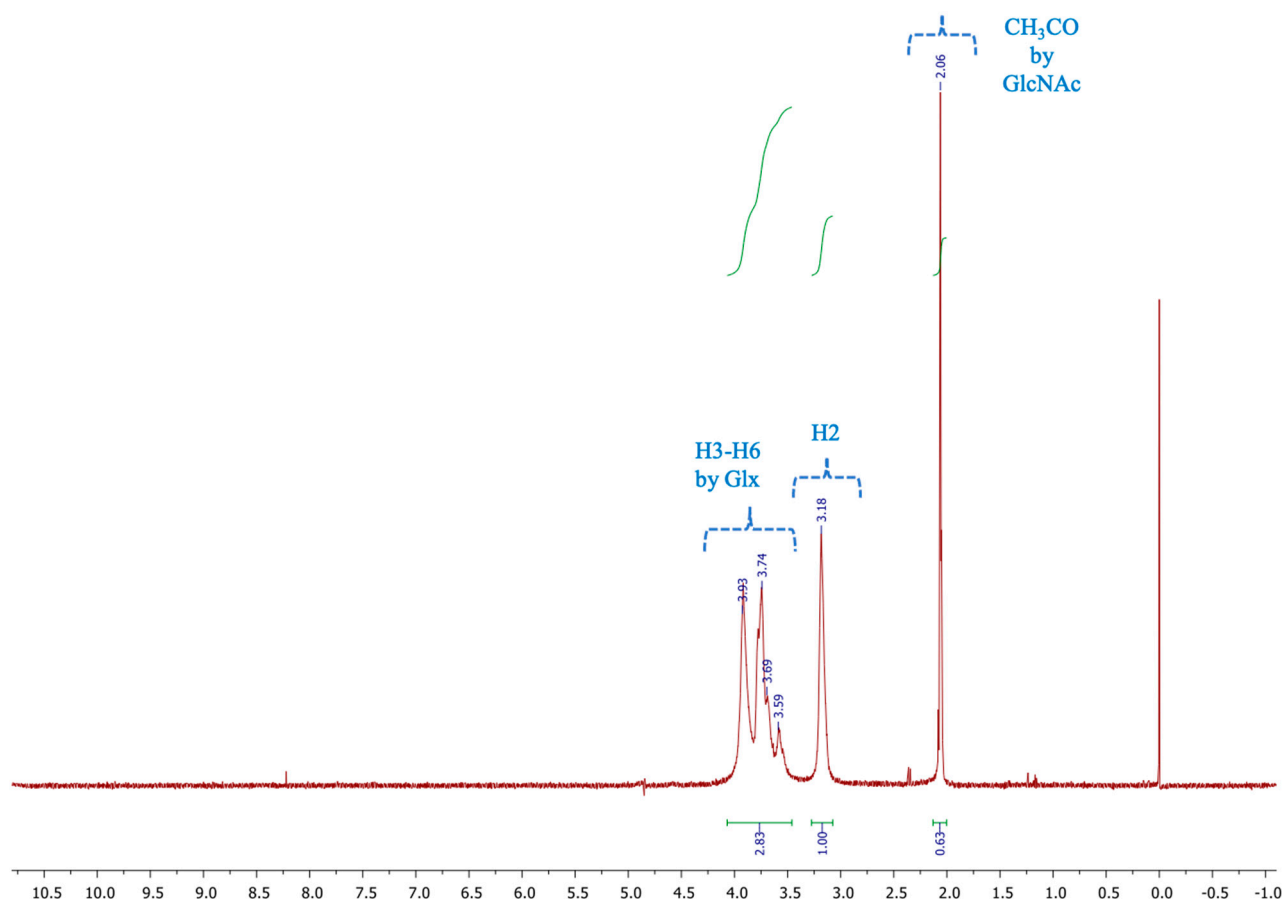

Figure S1. NMR spectrum (700 MHz, T=298K) of free chitosan in acidic D<sub>2</sub>O. Glx = Glc or GlNAc.

## S1. Materials and Methods

### S1.1. Methods

#### Dynamic viscosity analysis

The dynamic viscosity of a 1% Chitosan aqueous solution in 1% acetic acid was measured by The NμLine® Cone & Plate viscometer (Analytical Technology and Control Ltd, Broadway, Market Lavington, Devizes, Wiltshire SN10 5RQ, United Kingdom) equipped with a cone 2P, in the speed range 10-200 rpm at 20°C.
